# Supplementary material for: FAAH inhibition ameliorates breast cancer in a murine model
Source: PubMed Central journal article supplement (PMC10624203; doi:10.18632/oncotarget.28534), 2023-10-31
Supplement: oncotarget-14-28534-s001.pdf [file oncotarget-14-28534-s001.pdf]

## FAAH inhibition ameliorates breast cancer in a murine model

### SUPPLEMENTARY MATERIALS

#### A Cell Viability with Endocannabinoid, AEA

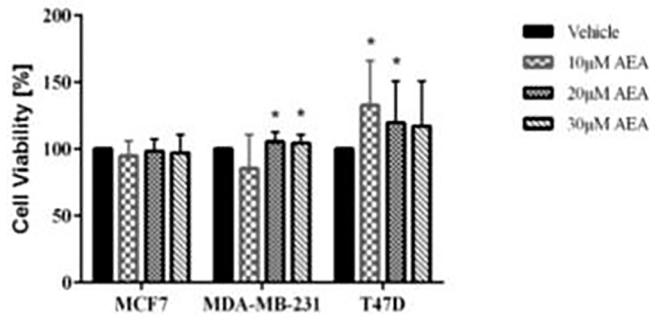

#### B Cell Viability with Endocannabinoid, PEA

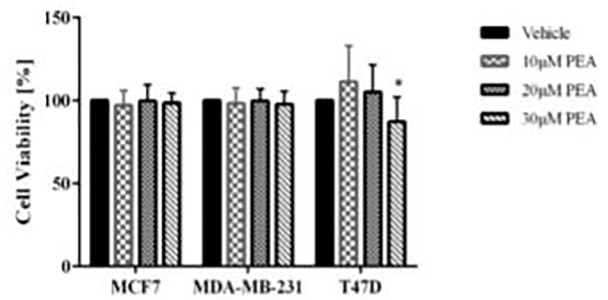

**Supplementary Figure 1: Impact of exogenous cannabinoids on breast cancer viability.** Cell viability assays were also conducted with exogenous cannabinoids, AEA (A) and PEA (B), using a vehicle control and AEA/PEA treatments at the following concentrations: 10 µM, 20 µM, and 30 µM. Statistical significance was determined using a non-parametric Mann-Whitney *U*-test ( $p < 0.05$ ).
